# Supplementary material for: Specific Eccentric–Isokinetic Cluster Training Improves Static Strength Elements on Rings for Elite Gymnasts
Source: Int J Environ Res Public Health. 2019 Nov 18;16(22):4571. doi: 10.3390/ijerph16224571 (PMC6888498; doi:10.3390/ijerph16224571)
Supplement: Supplementary file 1 [file ijerph-16-04571-s001.xlsx]

## Sheet: Tabelle1
Maximum strength static elements (kg)
Athlete Nr	Swallow Pre-Test	Swallow 1-week Posttest	Swallow 3-week Posttest	Support Scale Pre-Test	Support Scale 1-week Posttest	Support Scale 3-week Posttest
1	74.6	77.7	75.6	67.1	70.7	70.6
2	56.7	58.8	58.8	56.7	58.8	58.8
3	45.9	51.8	52	58.4	61.8	62
4	37.1	42.7	47.4	47.1	50.2	51.15
5	59.7	61.3	63	57.2	58.8	59.95
6	75.5	79.3	-	75.5	77.3	-
7	57.5	60	65	65	65	65
8	66.5	68.6	73.5	74	77.6	76
9	63.5	58.7	60.2	68.5	69.7	68.7
Maximum holding time static elements (s)
Athlete Nr	Swallow Pre-Test	Swallow 1-week Posttest	Swallow 3-week Posttest	Support Scale Pre-Test	Support Scale 1-week Posttest	Support Scale 3-week Posttest
1	4.525	4.6333	3.73337	3.975	10.7167	5.70837
2	5.4333	5.5834	8.5833	5.0583	5.1	6.5833
3	4.6917	10.9834	17.7666	3.99163	5.7417	5.625
4	5.225	12.5166	20.9583	3.54163	4.40003	6.12503
5	6.4167	7.75	8.00837	4.79163	4.6834	6.03333
6	4.4416	7.02503	-	5.00833	5.87497	-
7	4.8917	5.4166	9.0583	5.07497	5.9416	7.55
8	4.05	10.8166	10.975	3.4083	3.575	3.4
9	3.7583	0	0	5.6333	5.1083	4.1
Preconditioning strengthening exercises (kg)
Athlete Nr	Benchpress Pre-Test	Benchpress 1-week Posttest	Benchpress 3-week Posttest	Swallow supine Pre-Test	Swallow supine 1-week Posttest	Swallow supine 3-week Posttest
1	130	137.5	137.5	55	57.5	55
2	105	107.5	110	45	45	45
3	90	95	95	35	37.5	37.5
4	90	87.5	90	27.5	30	30
5	110	105	107.5	45	42.5	45
6	135	142.5	-	57.5	60	-
7	-	-	-	45	45	-
8	-	-	-	55	60	62.5
9	-	-	-	45	47.5	47.5
Athlete Nr	Age	Body weight Pre-Test	Body weight 1-week Posttest	Body weight 3-week Posttest	Height
1	23.337	74.6	75.7	75.6	174.8
2	19.9671	74.2	73.8	73.8	173.9
3	19.6274	70.9	69.3	69.5	171.3
4	18.9863	54.6	55.2	54.9	162.8
5	19.2959	72.2	71.3	71.2	175
6	23.663	75.5	75.3	-	174.8
7	23.389	65	65	65	164
8	22.7397	74	73.6	76	170
9	22.263	63.5	63.7	62.7	162
